# Supplementary material for: Impact of Chitosan Pretreatment to Reduce Microfibers Released from Synthetic Garments during Laundering
Source: MDPI journal article supplement (doi:10.3390/w13182480), 2021-09-09
Supplement: s1 [file s1]

**Table S1.** The characteristics of synthetic garments.

|           | structure | type    | garment type        |
|-----------|-----------|---------|---------------------|
| Polyester | Knit      | Terry s | Sports vest         |
| Polyamide | woven     | Plain S | Wind stopper jacket |
| Acrylic   | knit      | Rib F   | Knitted vest        |

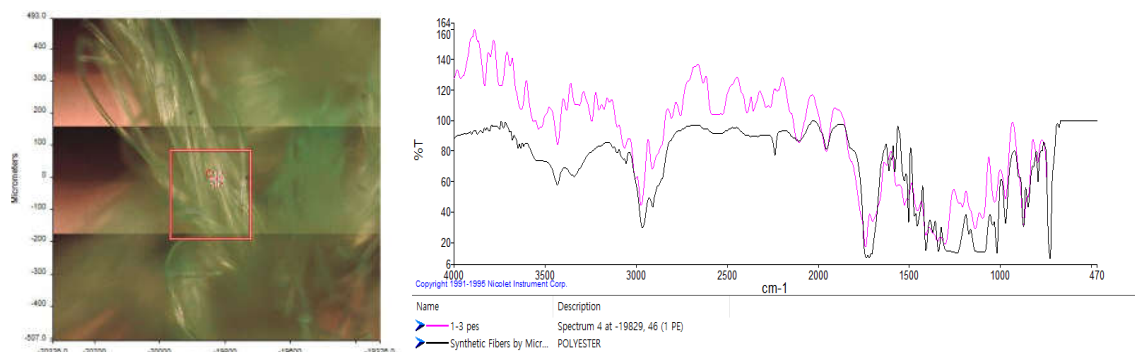

**Figure S1.** FT-IR result of polyester garment.

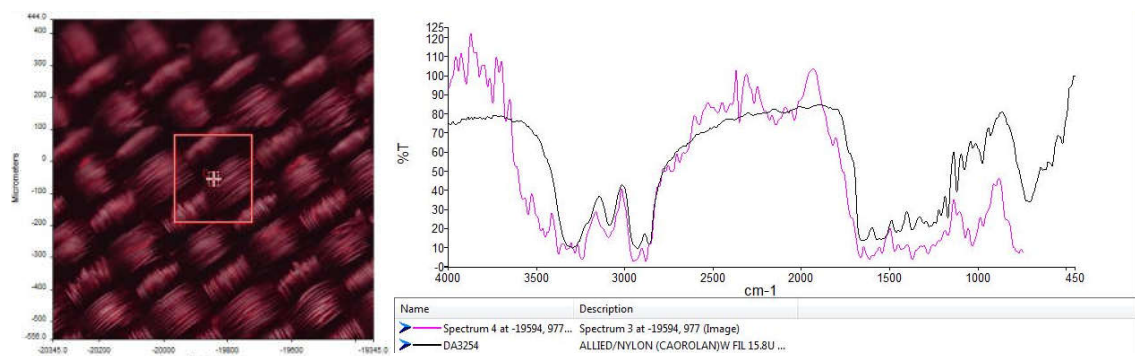

**Figure S2.** FT-IR result of polyamide (nylon) garment.

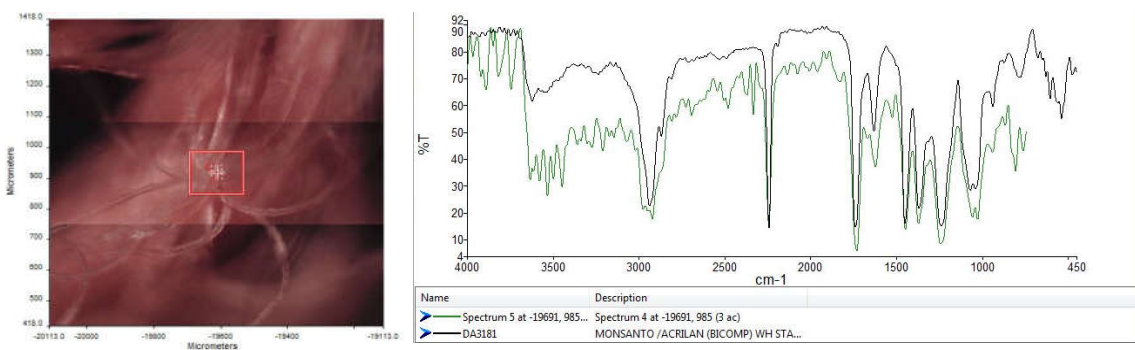

**Figure S3.** FT-IR result of acrylic garment.
